# Supplementary material for: A deep Tasman outflow of Pacific waters during the last glacial period
Source: Springer Nature journal article supplement (doi:10.1038/s41467-022-31116-7), 2022-06-30
Supplement: MOESM1 [file 41467_2022_31116_MOESM1_ESM.pdf]

### **Description of Additional Supplementary Files**

File Name: Supplementary Data 1

Description: Tasmanian cold-water coral data.
